# Supplementary material for: Upfront Surgery versus Neoadjuvant Therapy for Resectable Pancreatic Cancer: Systematic Review and Bayesian Network Meta-analysis
Source: PubMed Central journal article supplement (PMC6416273; doi:10.1038/s41598-019-40951-6), 2019-03-13
Supplement: 41598_2019_40951_MOESM1_ESM.pdf [file 41598_2019_40951_MOESM1_ESM.pdf]

**Upfront Surgery versus Neoadjuvant Therapy for Resectable  
Pancreatic Cancer: Systematic Review and Bayesian Network Meta-  
analysis**

**Alison Bradley<sup>1,2\*</sup>, Robert van der Meer<sup>1</sup>**

**Supplementary Methods1a.** Search terms for studies comparing neoadjuvant therapy versus surgery first and adjuvant therapy.

- neoadjuvant
- treatments neoadjuvant
- treatment neoadjuvant
- therapy neoadjuvant
- therapies neoadjuvant
- neoadjuvant treatments
- neoadjuvant treatment
- neoadjuvant therapy
- neoadjuvant therapies
- induction therapy
- neoadj
- upfront
- surgery
- operative surgery
- surgery operative
- surgical procedures operative
- surgical treatment
- surgical interventions
- procedures operative surgical
- procedures operative
- procedure operative
- operative surgical procedures
- operation surgery
- operation
- surgeries
- surgery specialty
- surgical aspects
- operative therapy
- operations
- operative procedure
- surgical
- surgical procedure
- surgical procedures
- tree surgeon
- tree surgeons
- pancreatic cancer
- cancer pancreas
- cancer pancreatic
- cancers pancreas
- cancers pancreatic
- malignant neoplasm pancreas
- pancreas cancer
- pancreas cancers
- pancreatic cancers
- malignant tumor of pancreas
- malignant tumour of pancreas
- pancreatic carcinoma
- pancreas carcinoma
- exocrine pancreas carcinoma

**Supplementary Methods1b:** Search terms for randomized control trials: surgery only versus surgery and adjuvant therapy.

- adjuvant
- adjuvants
- pharmaceutical adjuvants
- pharmaceutical adjuvant
- adjuvant pharmaceutical
- therapy
- encounter due to therapy
- therapeutic aspects
- disease management
- treatment
- therapeutic procedure
- therapeutic interventions
- therapies
- treatments
- remedy
- relief
- amelioration
- alleviation
- remedies
- therapeutic
- relieve
- ameliorate
- alleviate
- relieving
- alleviating
- alleviated
- ameliorated
- relieved
- pancreatic cancer
- cancer pancreas
- cancer pancreatic
- cancers pancreas
- cancers pancreatic
- malignant neoplasm pancreas
- pancreas cancer
- pancreas cancers
- pancreatic cancers
- malignant tumor of pancreas
- malignant tumour of pancreas
- pancreatic carcinoma
- pancreas carcinoma
- exocrine pancreas carcinoma

**Supplementary Figure 1a:** PRISMA flow chart: neoadjuvant therapy versus surgery first and adjuvant therapy

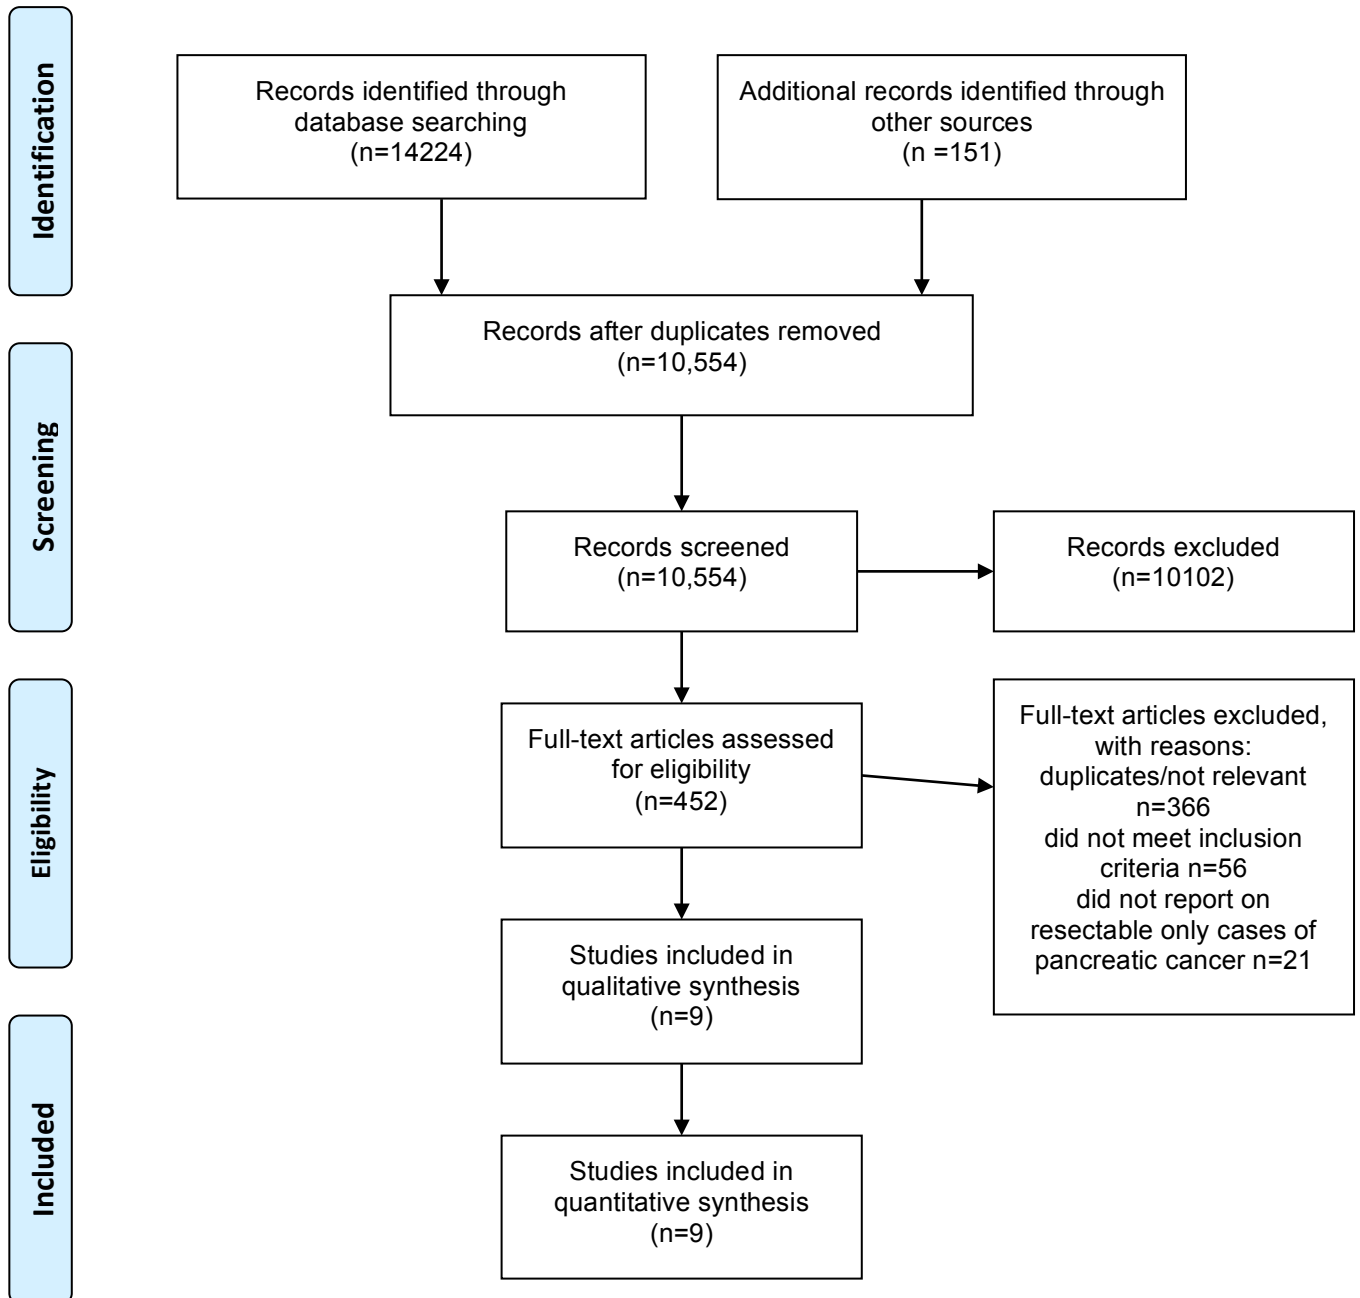

**Supplementary Figure1b:** PRISMA flow chart: surgery first and adjuvant therapy versus surgery only

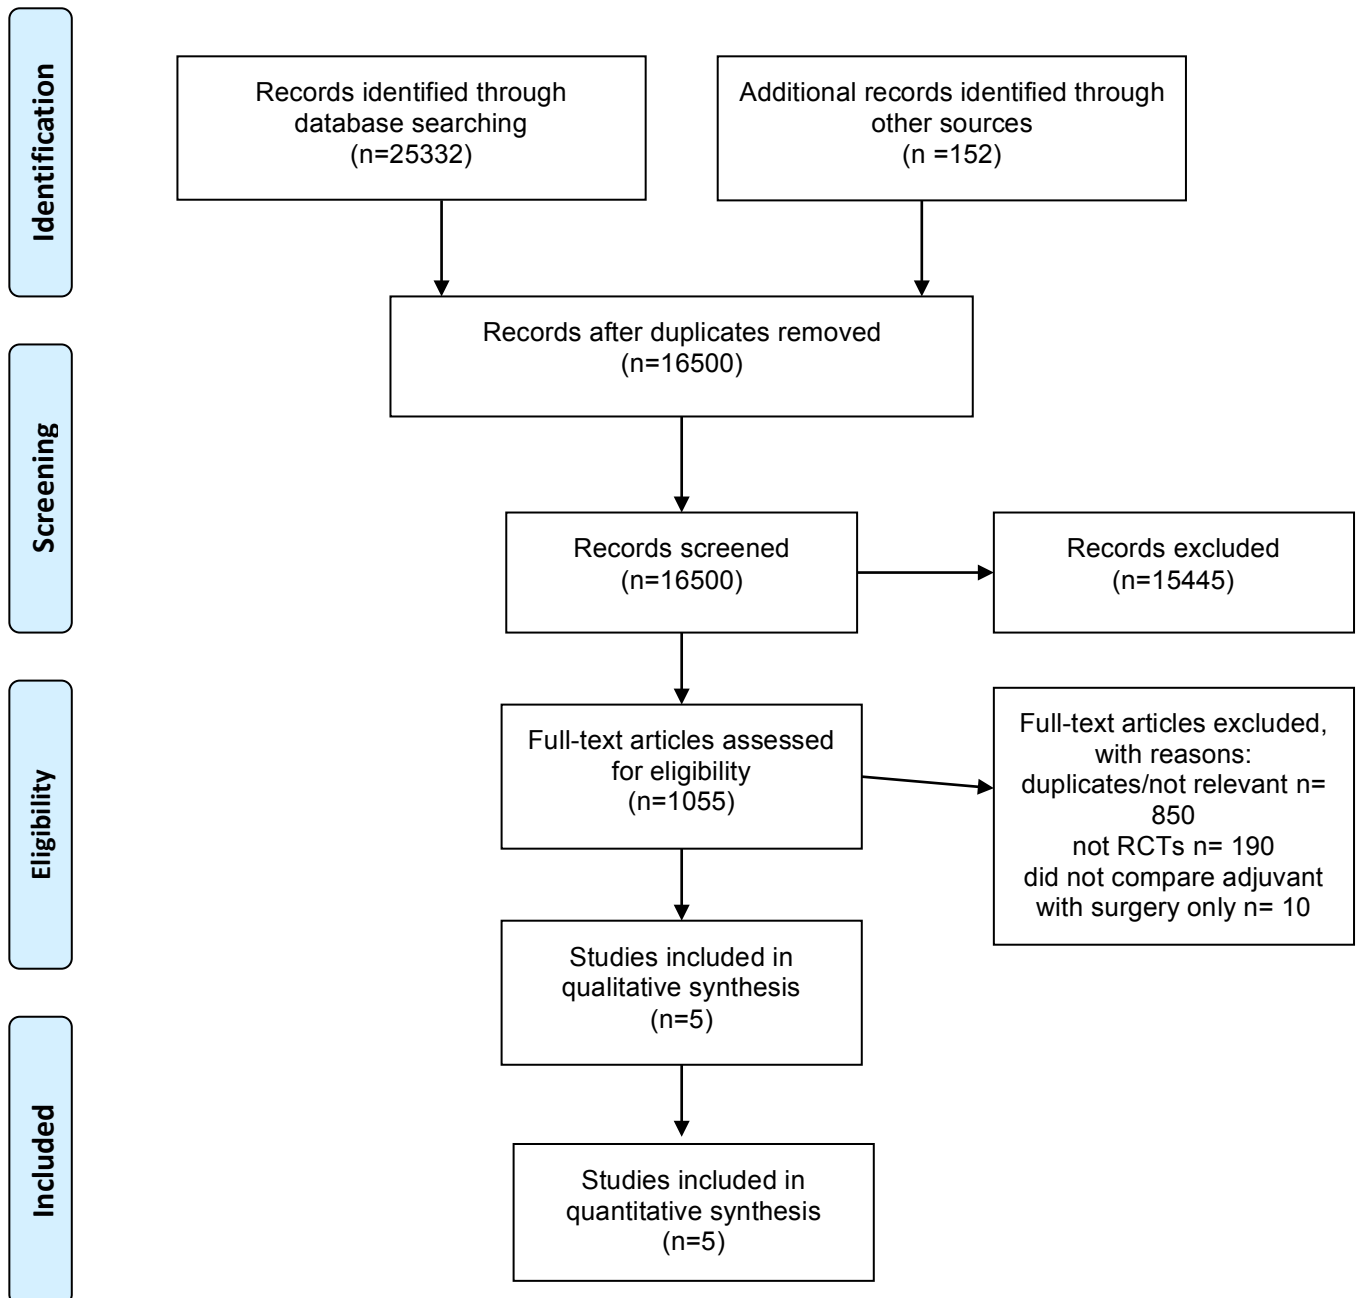

**Supplementary Table 1a:** Summary of included studies. Summary of studies comparing neoadjuvant therapy versus surgery first and adjuvant therapy.

| Study                                 | Study Type    | Randomised | Centre                     | NAT treatment Regime in addition to radiotherapy | Total No. patient in NAT arm | NAT arm Overall Survival in months for RPC | Total No. patients SFadj arm | SFadj arm Overall Survival in months | ROBINS -I risk of bias assessment |
|---------------------------------------|---------------|------------|----------------------------|--------------------------------------------------|------------------------------|--------------------------------------------|------------------------------|--------------------------------------|-----------------------------------|
| Golcher et al., 2015 <sup>29</sup>    | Phase II      | Yes        | Multiple                   | Gemcitabine/ cisplatin                           | 31                           | 17.4                                       | 33                           | 14.4                                 | Low                               |
| Vento et al., 2007 <sup>30</sup>      | Phase II      | No         | Single                     | Gemcitabine                                      | 22                           | 30.2                                       | 25                           | 35.9                                 | Moderate                          |
| Ielpo et al., 2017 <sup>31</sup>      | Prospective   | No         | Single                     | Gemcitabine +Nabpaclitaxel                       | 19                           | 21.65                                      | 36                           | 22.1                                 | Moderate                          |
| Roland et al., 2015 <sup>32</sup>     | Prospective   | No         | Single                     | Gemcitabine, 5-FU or capecitabine                | 222                          |                                            | 85                           |                                      | Moderate                          |
| DeGus et al., 2017 <sup>35</sup>      | Retrospective | No         | Multiple (cancer registry) | NAT: no further details given                    | 332                          | 26                                         | 11316                        | 24.5                                 | Moderate /Serious                 |
| Mokdad et al., 2017 <sup>36</sup>     | Retrospective | No         | Multiple (cancer registry) | NAT: no further details given                    | 2005                         | 26                                         | 6015                         | 21                                   | Moderate /Serious                 |
| Tzeng et al., 2014 <sup>33</sup>      | Prospective   | No         | Single                     | NAT: no further details given                    | 115                          | 28                                         | 62                           | 25.3                                 | Moderate /Serious                 |
| Fujii et al., 2016 <sup>34</sup>      | Prospective   | No         | Single                     | S1+5-FU+oteracil and gimeracil                   | 40                           | 24                                         | 416                          | 23                                   | Moderate /Serious                 |
| Papalezova et al., 2012 <sup>37</sup> | Retrospective | No         | Single                     | 5-FU                                             | 144                          | 15                                         | 92                           | 13                                   | Moderate /Serious                 |

**Supplementary Table1b:** Summary of included studies. Summary of randomized controlled trials comparing upfront and adjuvant therapy versus surgery only.

| Study                             | Adjuvant Regime | Adjuvant chemotherapy agents              | No. SFadj arm | Overall survival in months SFadj arm | No. Surgery Only arm | Overall survival in surgery only arm |
|-----------------------------------|-----------------|-------------------------------------------|---------------|--------------------------------------|----------------------|--------------------------------------|
| Ueno et al., 2009 <sup>38</sup>   | CT              | Gemcitabine                               | 58            | 22.3                                 | 60                   | 18.4                                 |
| Oettle et al., 2013 <sup>39</sup> | CT              | Gemcitabine                               | 179           | 22.8                                 | 175                  | 20.2                                 |
| Kosuge et al., 2006 <sup>40</sup> | CT              | Cisplatin + 5-FU                          | 45            | 12.5                                 | 44                   | 15.8                                 |
| Smeenk et al., 2007 <sup>41</sup> | CRT             | 5-FU                                      | 110           | 21.6                                 | 108                  | 19.2                                 |
| Morak et al., 2008 <sup>42</sup>  | CRT             | 5-FU+folic acid+ mitoxantrone + cisplatin | 59            | 19                                   | 61                   | 18                                   |

**Supplementary Figure2a:** Assessment of risk of bias. Assessment of the risk of bias of studies comparing neoadjuvant therapy versus upfront surgery and adjuvant therapy for the treatment of resectable pancreatic cancer.

|                         | Random sequence generation (selection bias) | Allocation concealment (selection bias) | Blinding of participants and personnel (performance bias) | Blinding of outcome assessment (detection bias) | Incomplete outcome data (attrition bias) | Selective reporting (reporting bias) | Other bias |
|-------------------------|---------------------------------------------|-----------------------------------------|-----------------------------------------------------------|-------------------------------------------------|------------------------------------------|--------------------------------------|------------|
| de Gus et al., 2017b    | -                                           | -                                       | -                                                         | -                                               |                                          | +                                    |            |
| Fujii et al., 2016      | -                                           | -                                       | -                                                         | -                                               | +                                        | +                                    | -          |
| Golcher et al., 2015    | +                                           | +                                       |                                                           |                                                 | +                                        | +                                    | -          |
| Ielpo et al., 2017      | -                                           | -                                       | -                                                         | -                                               | +                                        | +                                    | -          |
| Mokdad et al., 2017     | -                                           | -                                       | -                                                         | -                                               |                                          | +                                    |            |
| Papalezova et al., 2012 | -                                           | -                                       | -                                                         | -                                               | +                                        | +                                    | -          |
| Roland et al., 2015     | -                                           | -                                       | -                                                         | -                                               | +                                        | +                                    | -          |
| Tzeng et al., 2014      | -                                           | -                                       | -                                                         | -                                               | +                                        | +                                    | -          |
| Vento et al., 2007      | +                                           |                                         |                                                           |                                                 |                                          |                                      | -          |



**Supplementary Figure2b:** Assessment of risk of bias. Assessment of the risk of bias of randomized controlled trials comparing upfront surgery and adjuvant therapy versus surgery only for resectable pancreatic cancer.

|             | Random sequence generation (selection bias) | Allocation concealment (selection bias) | Blinding of participants and personnel (performance bias) | Blinding of outcome assessment (detection bias) | Incomplete outcome data (attrition bias) | Selective reporting (reporting bias) | Other bias |
|-------------|---------------------------------------------|-----------------------------------------|-----------------------------------------------------------|-------------------------------------------------|------------------------------------------|--------------------------------------|------------|
| Kosuge 2006 | +                                           | +                                       |                                                           |                                                 | +                                        | +                                    | +          |
| Morak 2008  | +                                           | +                                       |                                                           |                                                 |                                          | +                                    | +          |
| Oettle 2013 | +                                           | +                                       |                                                           |                                                 |                                          | +                                    | +          |
| Smeenk 2007 | +                                           | +                                       |                                                           |                                                 | -                                        | +                                    |            |
| Ueno 2009   | +                                           | +                                       |                                                           |                                                 | -                                        | +                                    | +          |

**Supplementary Figure3a:** Results for 1-year survival. Results of fixed effects and random effects (vague prior) models.

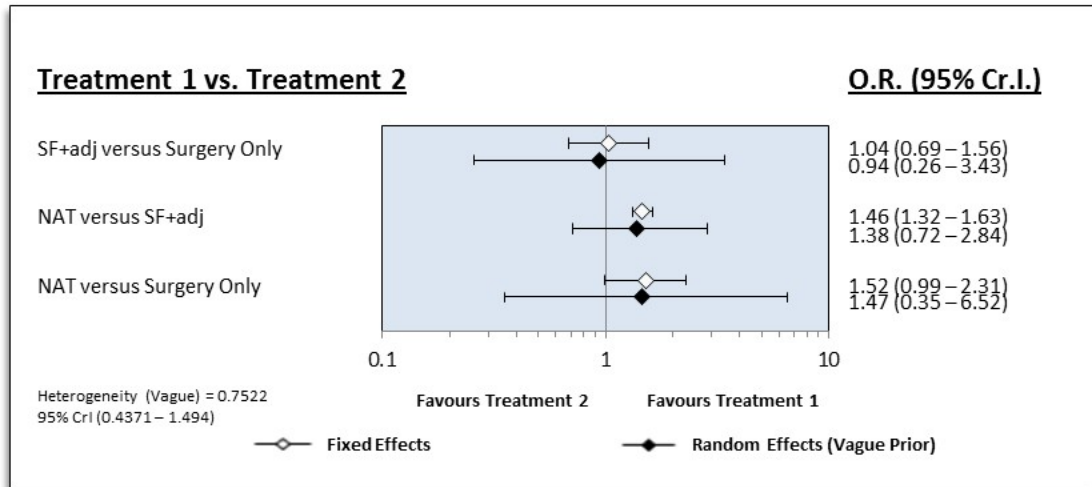

**Supplementary Figure3b:** Results for 1-year survival. League table based on Results of fixed effects and random effects (vague prior) models. Where the displayed odds ratio is greater than 1, treatment at top left is superior.

|                       |                       |                     |
|-----------------------|-----------------------|---------------------|
| <b>NAT</b>            |                       |                     |
| 1.46<br>(1.32 – 1.63) | <b>SF+adj</b>         |                     |
| 1.52<br>(0.99 – 2.31) | 1.04<br>(0.69 – 1.56) | <b>Surgery Only</b> |

**Supplementary Figure3c:** Results for 1-year survival. Rankogram summarizing SUCRA scores

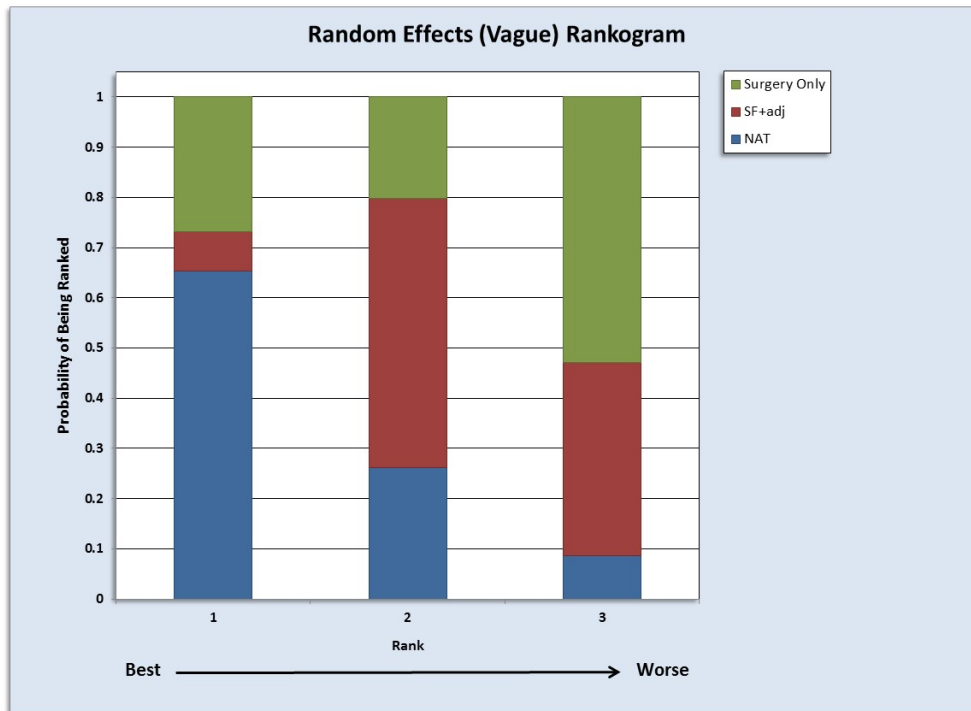

**Supplementary Figure4a:** Results for 2-year survival. Results of fixed effects and random effects (vague prior) models.

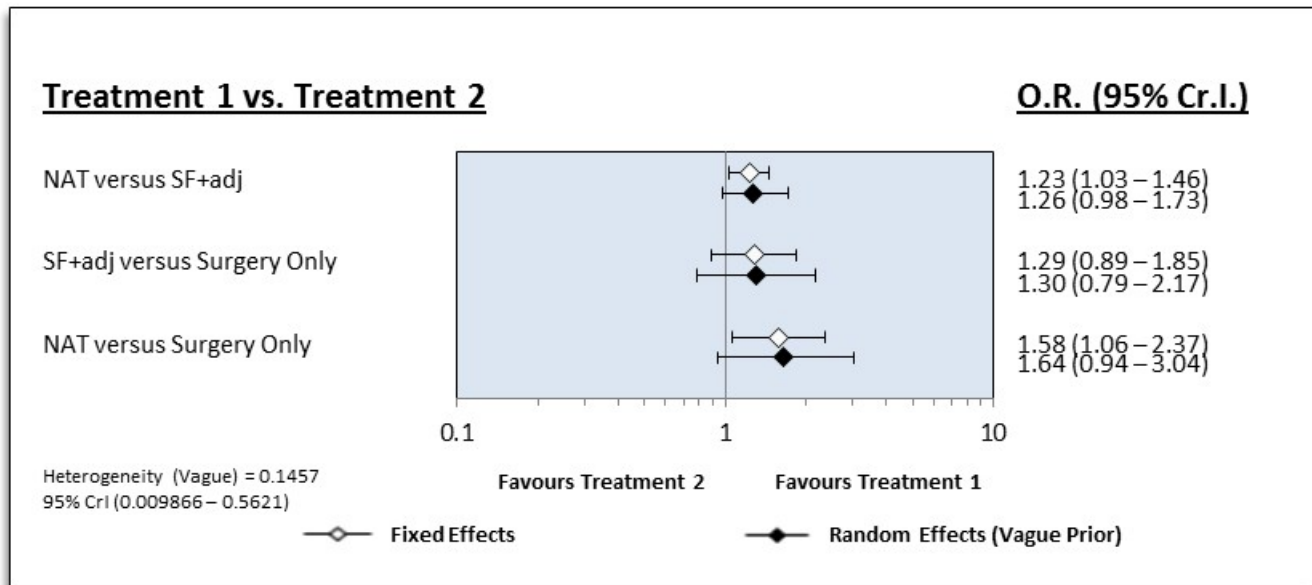

**Supplementary Figure4b:** Results for 4-year survival. League table based on Results of fixed effects and random effects (vague prior) models. Where the displayed odds ratio is greater than 1, treatment at top left is superior.

|                       |                       |                     |
|-----------------------|-----------------------|---------------------|
| <b>NAT</b>            |                       |                     |
| 1.23<br>(1.03 – 1.46) | <b>SF+adj</b>         |                     |
| 1.58<br>(1.06 – 2.37) | 1.29<br>(0.89 – 1.85) | <b>Surgery Only</b> |

**Supplementary Figure4c:** Results for 2-year survival. Rankogram summarizing SUCRA scores

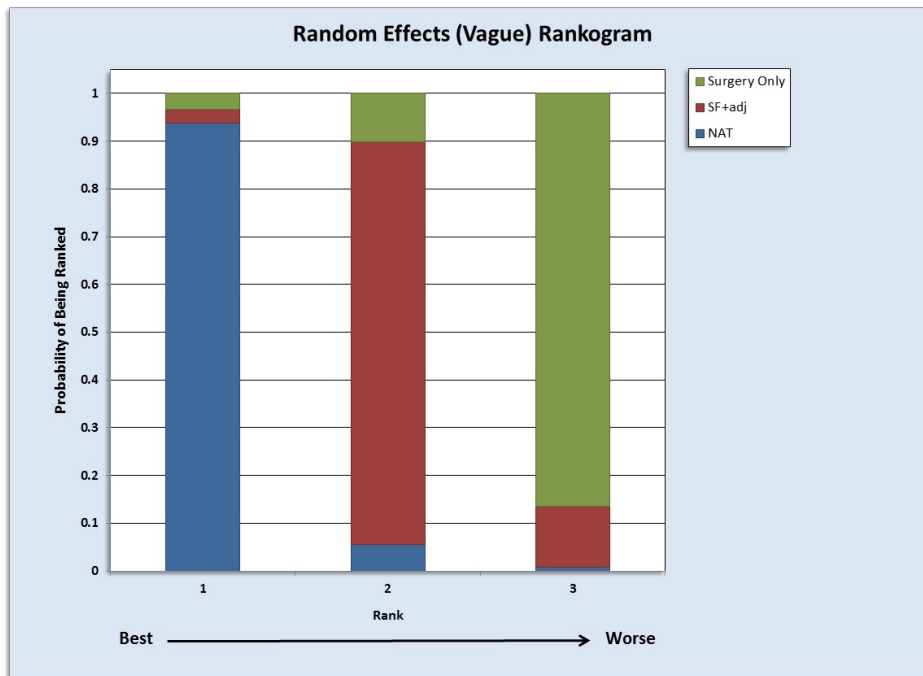

**Supplementary Figure 5a:** Results for 3-year survival. Results of fixed effects and random effects (vague prior) models.

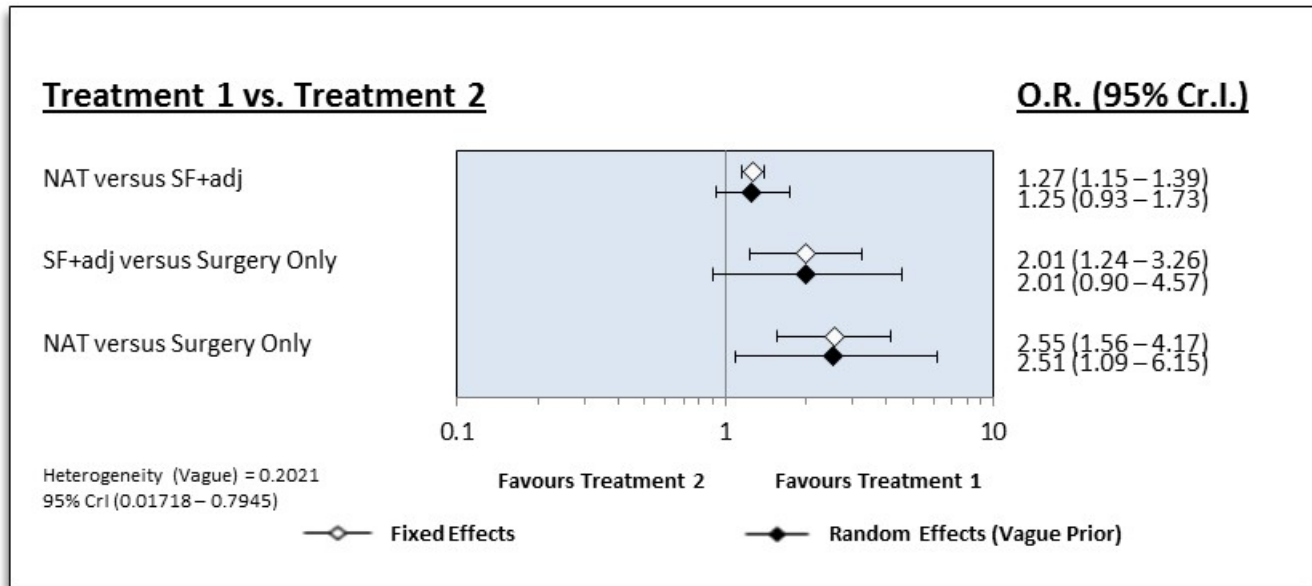



**Supplementary Figure5b:** Results for 3-year survival. League table based on Results of fixed effects and random effects (vague prior) models. Where the displayed odds ratio is greater than 1, treatment at top left is superior.

|                       |                       |                     |
|-----------------------|-----------------------|---------------------|
| <b>NAT</b>            |                       |                     |
| 1.27<br>(1.15 – 1.39) | <b>SF+adj</b>         |                     |
| 2.55<br>(1.56 – 4.17) | 2.01<br>(1.24 – 3.26) | <b>Surgery Only</b> |

**Supplementary Figure5c:** Results for 3-year survival. Rankogram summarizing SUCRA scores

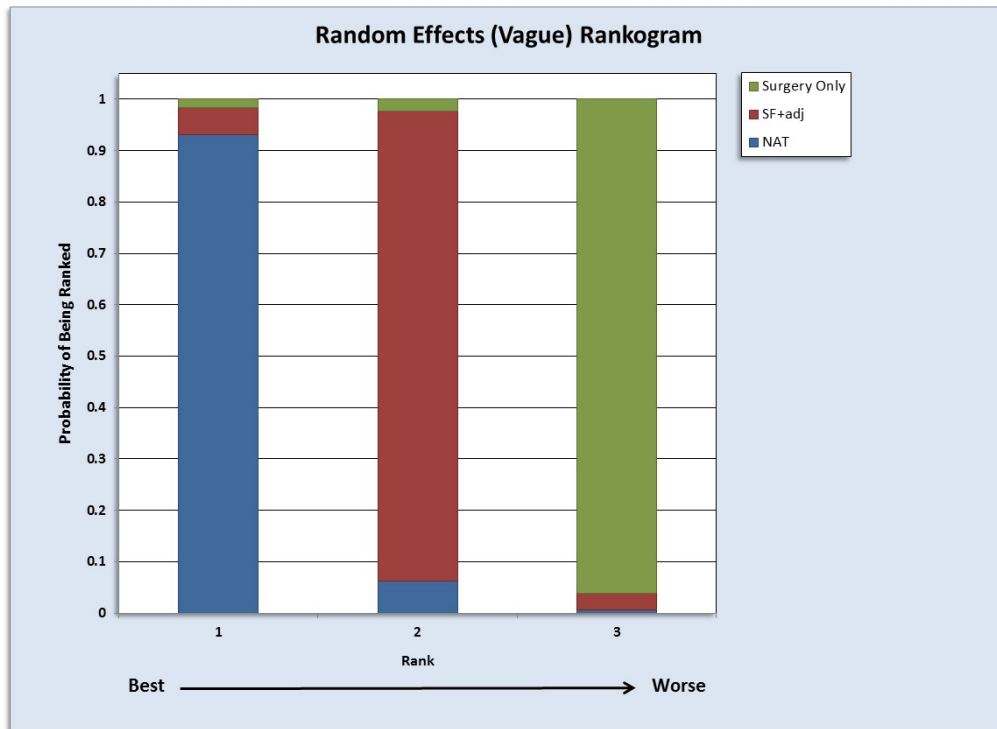

**Supplementary Figure6a:** Results for 5-year survival. Results of fixed effects and random effects (vague prior) models.

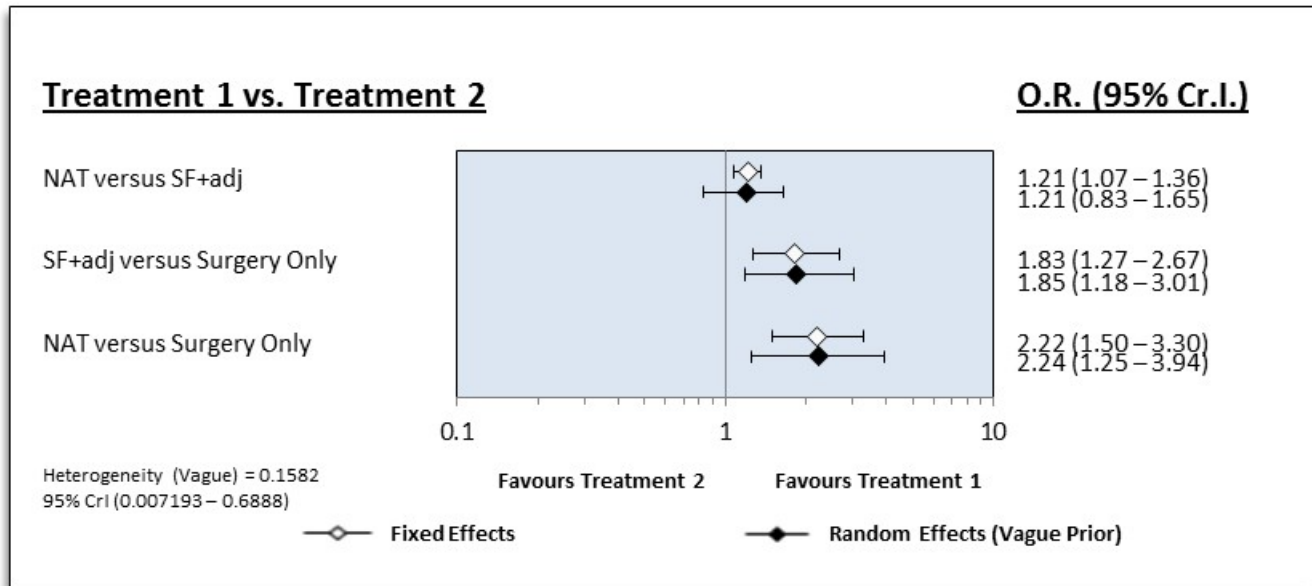

**Supplementary Figure6b:** Results for 5-year survival. League table based on Results of fixed effects and random effects (vague prior) models. Where the displayed odds ratio is greater than 1, treatment at top left is superior.

|                       |                       |                     |
|-----------------------|-----------------------|---------------------|
| <b>NAT</b>            |                       |                     |
| 1.21<br>(1.07 – 1.36) | <b>SF+adj</b>         |                     |
| 2.22<br>(1.50 – 3.30) | 1.83<br>(1.27 – 2.67) | <b>Surgery Only</b> |

**Supplementary Figure6c:** Results for 5-year survival. Rankogram summarizing SUCRA scores

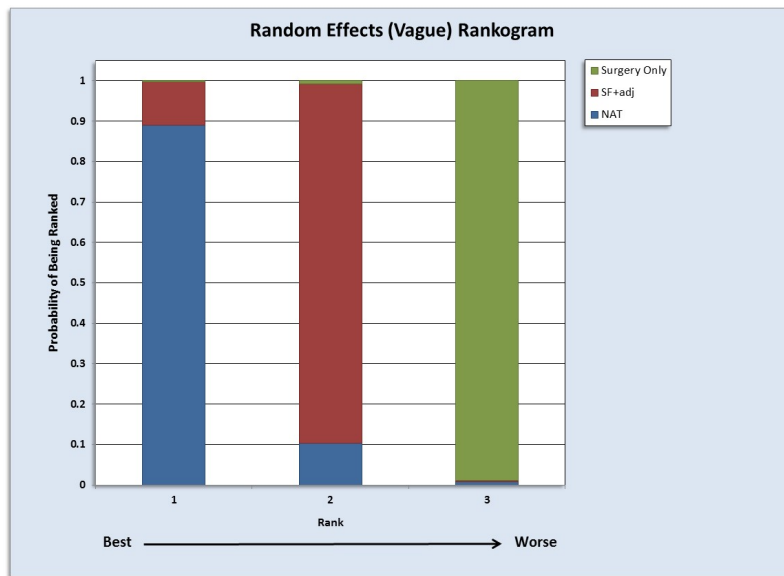

**Supplementary Figure7:** GRADE assessment of strength of recommendations. An assessment of the strength of overall recommendations from the network meta-analysis according to the GRADE assessment criteria.

| CRITERIA              |                                                                                                            | SUMMARY OF JUDGEMENTS                                                                                               |                                                                                                                                               |                                                                                                                         |                                                                                                                |
|-----------------------|------------------------------------------------------------------------------------------------------------|---------------------------------------------------------------------------------------------------------------------|-----------------------------------------------------------------------------------------------------------------------------------------------|-------------------------------------------------------------------------------------------------------------------------|----------------------------------------------------------------------------------------------------------------|
| PROBLEM               | No                                                                                                         | Probably no                                                                                                         | Probably yes                                                                                                                                  | Yes                                                                                                                     |                                                                                                                |
| DESIRABLE EFFECTS     | Trivial                                                                                                    | Small                                                                                                               | Moderate                                                                                                                                      | Large                                                                                                                   |                                                                                                                |
| UNDESIRABLE EFFECTS   | Large                                                                                                      | Moderate                                                                                                            | Small                                                                                                                                         | Trivial                                                                                                                 |                                                                                                                |
| CERTAINTY OF EVIDENCE | Very low                                                                                                   | Low                                                                                                                 | Moderate                                                                                                                                      | High                                                                                                                    |                                                                                                                |
| VALUES                | Important uncertainty or variability                                                                       | Possibly important uncertainty or variability                                                                       | Probably no important uncertainty or variability                                                                                              | No important uncertainty or variability                                                                                 |                                                                                                                |
| BALANCE OF EFFECTS    | Favors the comparison<br> | Probably favors the comparison<br> | Does not favor either the intervention or the comparison<br> | Probably favors the intervention<br> | Favors the intervention<br> |
| ACCEPTABILITY         | No                                                                                                         | Probably no                                                                                                         | Probably yes                                                                                                                                  | Yes                                                                                                                     |                                                                                                                |
| FEASIBILITY           | No                                                                                                         | Probably no                                                                                                         | Probably yes                                                                                                                                  | Yes                                                                                                                     |                                                                                                                |
